# Supplementary material for: Selective cancer treatment via photodynamic sensitization of hypoxia-responsive drug delivery
Source: Royal Society of Chemistry journal article supplement (doi:10.1039/c7nr07677k), 2017-12-27
Supplement: c7nr07677k1.pdf [file c7nr07677k1.pdf]

# Electronic Supplementary Information

## Selective Cancer Treatment via Photodynamic Sensitization of Hypoxia-Responsive Drug Delivery

*Hua He<sup>a,#</sup>, Rongying Zhu<sup>b,#</sup>, Wei Sun<sup>c,\*</sup>, Kaimin Cai<sup>d</sup>, Yongbing Chen<sup>b,\*</sup>, Lichen Yin<sup>a,\*</sup>*

<sup>a</sup> Jiangsu Key Laboratory for Carbon-Based Functional Materials and Devices, Institute of Functional Nano & Soft Materials (FUNSOM), Collaborative Innovation Center of Suzhou Nano Science & Technology, Soochow University, Suzhou 215123, P.R. China

<sup>b</sup> Department of Cardiothoracic Surgery, the Second Affiliated Hospital of Soochow University, Suzhou 215004, P.R. China

<sup>c</sup> Department of General Surgery, Affiliated Shengjing Hospital, China Medical University, Shenyang 110004, China

<sup>d</sup> Department of Materials Science and Engineering, University of Illinois at Urbana-Champaign, Urbana IL 61801, USA

<sup>#</sup> These authors contributed equally.

\*Corresponding author:

Email: [lcyin@suda.edu.cn](mailto:lcyin@suda.edu.cn) (L. Yin); Phone: 86-512-65882039;

[chentongt@sina.com](mailto:chentongt@sina.com) (Y. Chen); Phone: 86-512-67784776;

[sunw@sj-hospital.org](mailto:sunw@sj-hospital.org) (W. Sun); Phone: 86-24-96615-31311.

**Table S1** The IC<sub>50</sub> (μg/mL) of DOX in HC/PN/DOX NPs toward LLC cells with or without pre-treatment of HA.

|                          | w/o HA | w/ HA |
|--------------------------|--------|-------|
| IC <sub>50</sub> (μg/mL) | 1.15   | 4.40  |

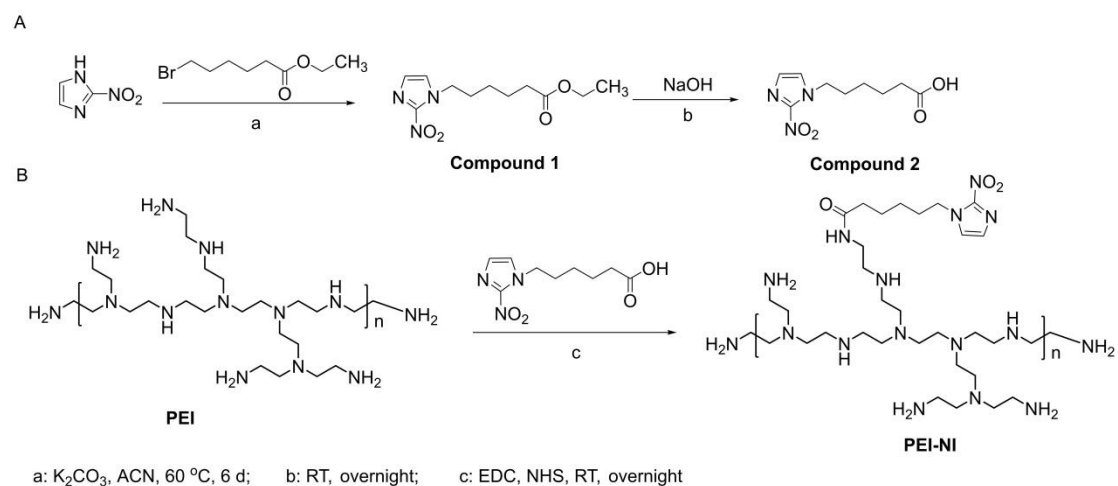

**Scheme S1** Synthetic route of **compound 2** (A) and PEI-NI (B).

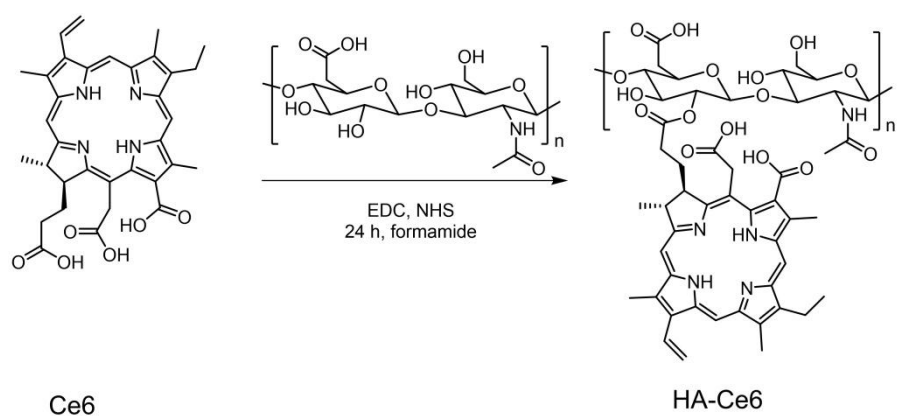

**Scheme S2** Synthetic route of HA-Ce6 (HC).

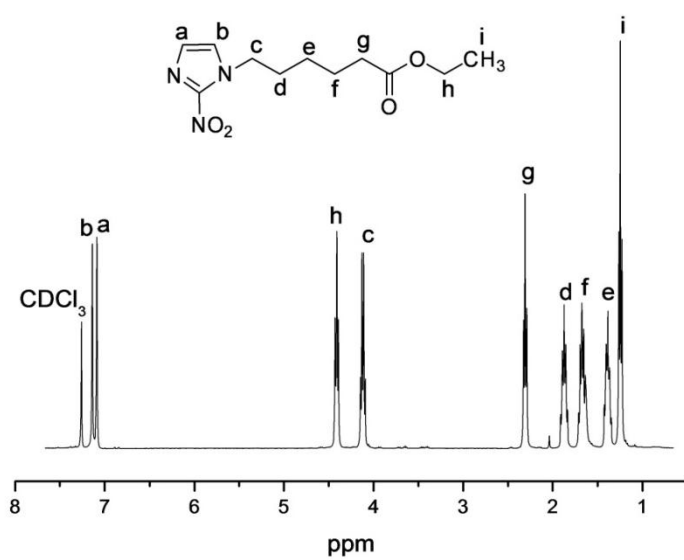

**Fig. S1** <sup>1</sup>H NMR spectrum of **compound 1** (CDCl<sub>3</sub>, 400 MHz).

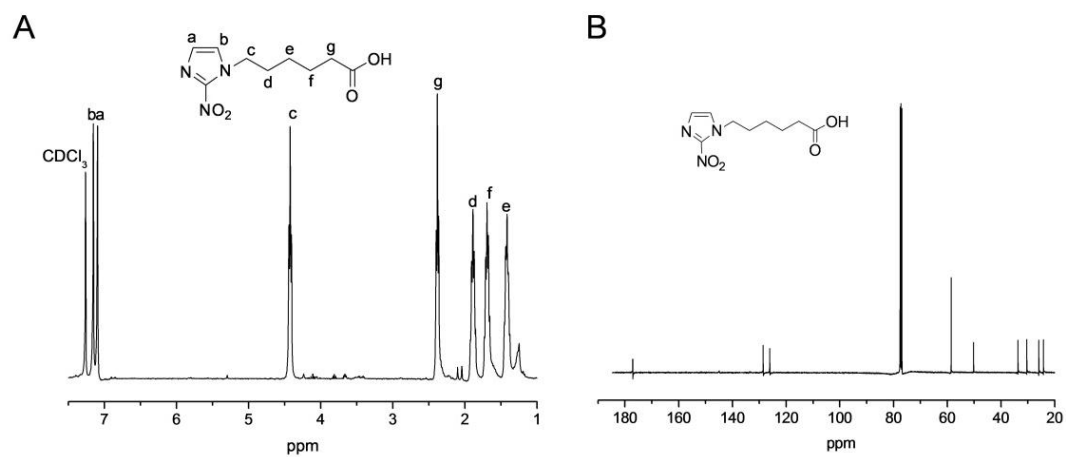

**Fig. S2**  $^1\text{H}$  NMR (A) and  $^{13}\text{C}$  NMR (B) spectra of **compound 2** ( $\text{CDCl}_3$ , 400 MHz).

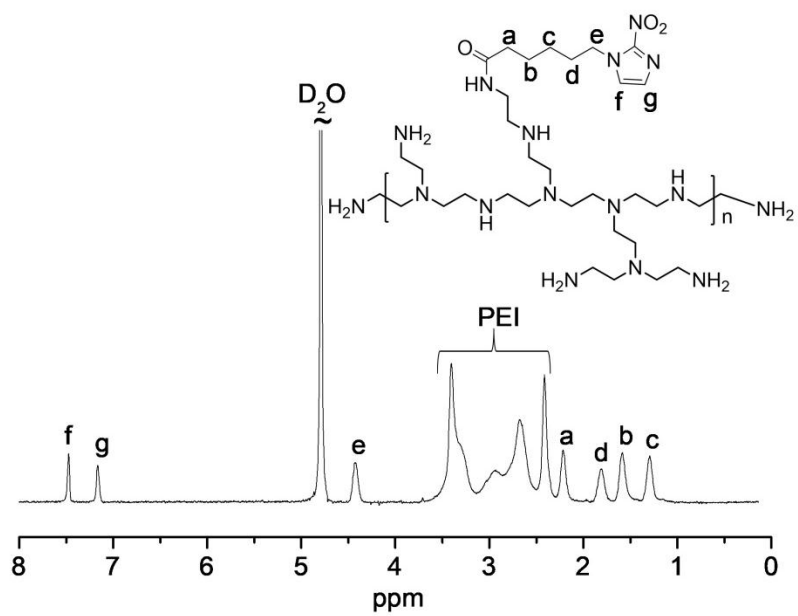

**Fig. S3**  $^1\text{H}$  NMR spectrum of PEI-NI ( $\text{D}_2\text{O}$ , 400 MHz).

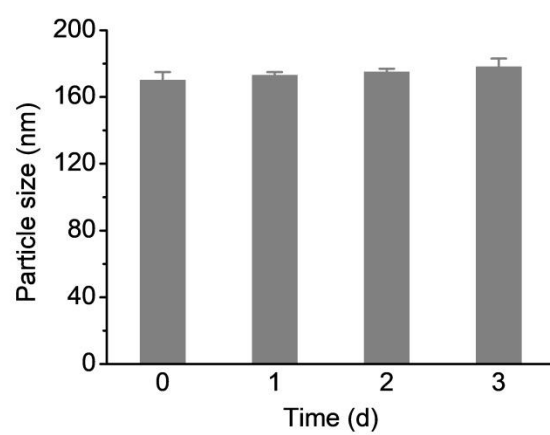

**Fig. S4** Alteration of particle size of HC/PN/DOX NPs after incubation with DMEM containing 10% FBS.

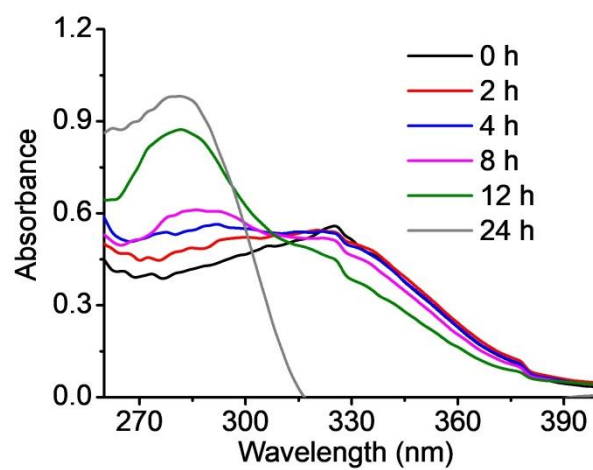

**Fig. S5** UV-Vis spectra of HA/PN NPs in HEPES buffer containing 100  $\mu$ M NADPH under hypoxic condition for different time.

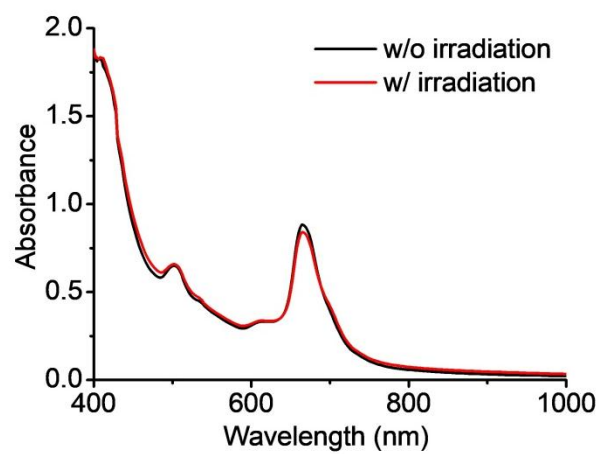

**Fig. S6.** UV-Vis spectra of Ce6 in HC/PN NPs before and after light irradiation (660 nm, 10 mW/cm<sup>2</sup>, 30 min).

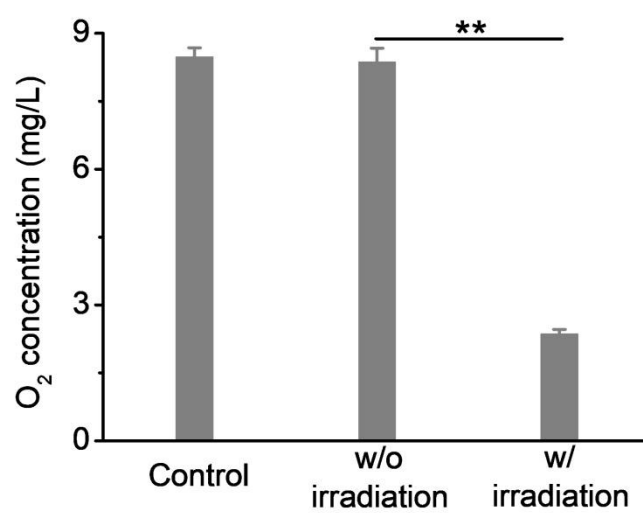

**Fig. S7.** Alteration of O<sub>2</sub> concentration in HC/PN NPs before and after light irradiation (660 nm, 10 mW/cm<sup>2</sup>, 30 min).

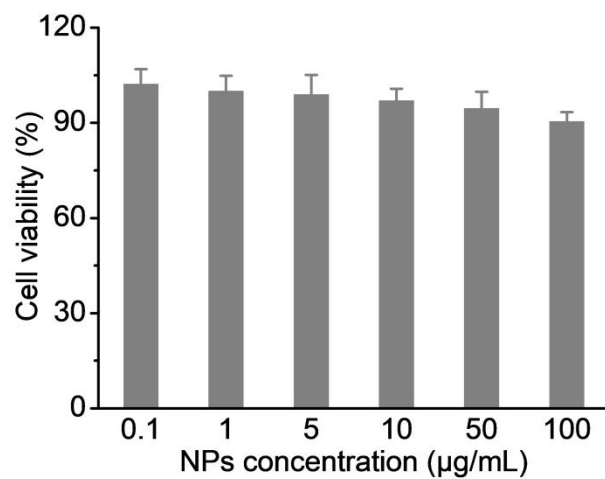

**Fig. S8** Cytotoxicity of HC/PN NPs toward LLC cells following 72-h incubation at various NPs concentrations as determined by the MTT assay (n = 3).

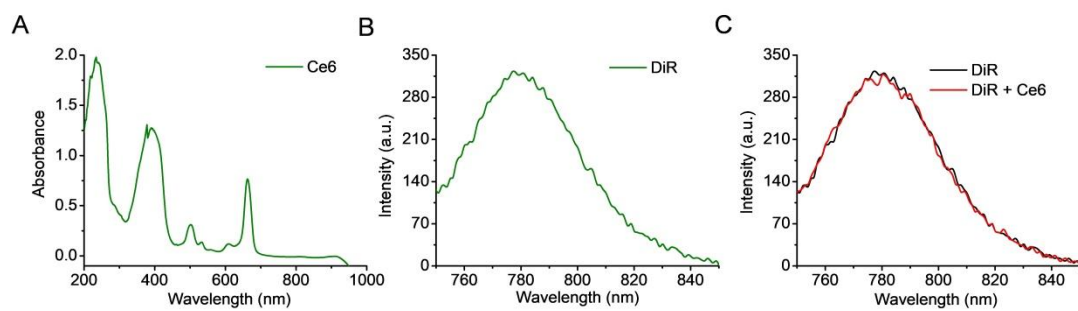

**Fig. S9.** (A) UV-Vis spectra of Ce6 in DMF. (B) Fluorescence spectra of DiR in DMF. (C) Fluorescence spectra of DiR and a mixture of DiR and Ce6.

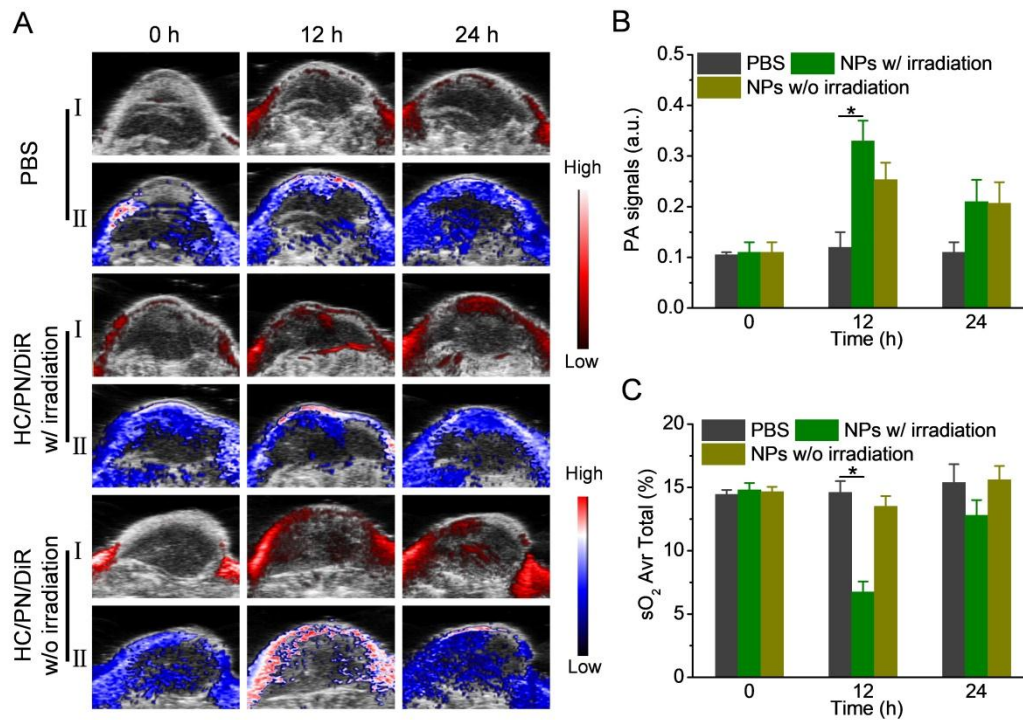

**Fig. S10.** (A) Representative PA images of LLC tumors showing the tumoral accumulation of DiR-containing NPs and tumoral oxygenation status as indicated by the ratios of oxygenated hemoglobin ( $\lambda = 850$  nm) to deoxygenated hemoglobin ( $\lambda = 750$  nm) after indicated treatments. (I: DiR; II: oxyhemoglobin). (B) Tumoral distribution level of DiR-containing NPs as indicated by the quantified PA signals in the tumors at different time points after treatment ( $n = 3$ ). (C) Quantification of the oxyhemoglobin saturation in the tumors at different time points after treatment ( $n = 3$ ).

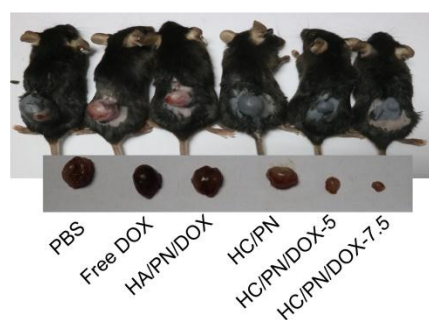

**Fig. S11** *In vivo* anticancer performance of PBS, free DOX, HA/PN/DOX NPs, HC/PN NPs, and HC/PN/DOX NPs in LLC tumor-bearing C57BL/6 mice. Mice were treated as described in Fig. 6, and photographs were taken on day 12.

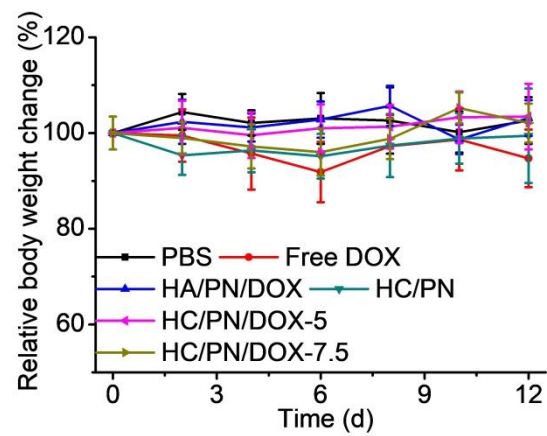

**Fig. S12** Body weight changes of mice treated as described in Fig. 6 within the observation period of 12 d (n = 8).

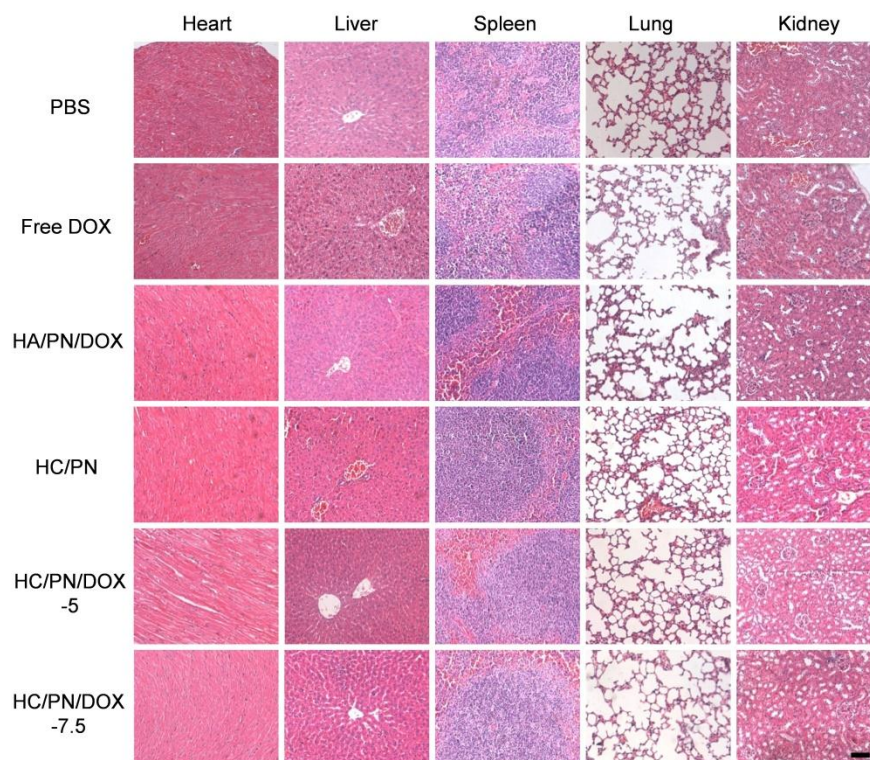

**Fig. S13** H&E staining of major organ sections harvested from mice on day 12. Bar represents 100  $\mu\text{m}$ .
